# Supplementary material for: Disease, Drugs and Dysbiosis: Understanding Microbial Signatures in Metabolic Disease and Medical Interventions
Source: Microorganisms. 2020 Sep 9;8(9):1381. doi: 10.3390/microorganisms8091381 (PMC7565856; doi:10.3390/microorganisms8091381)
Supplement: Supplementary file 1 [file microorganisms-08-01381-s001.xlsx]

## Sheet: Sheet 1
Tables
Table 1	Bacterial genera increased or decreased in diseases
Table 2	Bacterial genera increased or decreased in interventions/drugs
Table 3	Bacterial genera increased or decreased in gastric bands

## Sheet: Table 1
Table 1:	Bacterial taxa increased and decreased in diseases
Bold - Genus is seen In more than one study
Increased	Md Increased	Obesity {Liu, 2017 #76} {Pasolli, 2016 #170}	ACVD {Jie, 2017 #166}	T2D {Zhao, 2019 #102}{Inoue, 2017 #164}{Zhong, 2019 #165} {Pasolli, 2016 #170}	IBD- CD {Vich Vila, 2018 #167}{Pasolli, 2016 #170}{Jones, 2020 #173}{Duranti, 2016 #174}	IBD-UC {Vich Vila, 2018 #167} {Knoll, 2017 #168}{Pasolli, 2016 #170}	NAFLD {Wang, 2016 #171} {Dong, 2020 #172}	Liver Cirrhosis {Chen, 2016 #169} {Pasolli, 2016 #170}	PD {Hill‐Burns, 2017 #175}{Petrov, 2017 #176}	AZ{Vogt, 2017 #177} {Haran, 2019 #178}	Decreased	Md Increased	Obesity {Liu, 2017 #76} {Pasolli, 2016 #170}	ACVD {Jie, 2017 #166}	T2D {Zhao, 2019 #102}{Inoue, 2017 #164}{Zhong, 2019 #165} {Pasolli, 2016 #170}	IBD- CD {Vich Vila, 2018 #167}{Pasolli, 2016 #170}{Jones, 2020 #173}{Duranti, 2016 #174}	IBD-UC {Vich Vila, 2018 #167} {Knoll, 2017 #168}{Pasolli, 2016 #170}	NAFLD {Wang, 2016 #171} {Dong, 2020 #172}	Liver Cirrhosis {Chen, 2016 #169} {Pasolli, 2016 #170}	PD {Hill‐Burns, 2017 #175}{Petrov, 2017 #176}	AZ{Vogt, 2017 #177} {Haran, 2019 #178}
	Acidaminococcus	Acidaminococcus	Actinomyces	Bacteroides	Actinomyces	Alistipes	Akkermansia	Actinobacillus	Akkermansia	Alistipes		Acetivibrio	Acetivibrio	Alistipes	Akkermansia	Acetivibrio	Akkermansia	Anaerosporabacter	Ammoniphilus	Bacteroides	Adlercreutzia
	Actinomyces	Actinomyces	Akkermansia	Barnesiella	Anaerostipes	Anaerococcus	Bifidobacterium	Actinomyces	Bifidobacterium	Bacteroides		Acidovorax	Acidovorax	Bacteroides	Anaerostipes	Actinomyces	Alistipes	Anaerotruncs	Bacteroides	Blautia	Bifidobacterium
	Akkermansia	Bacteroides	Atopobium	Bifidobacterium	Bacteroides	Anaerotruncus	Cantenibacterium	Atopobium	Catabacter	Barnesiella		Actinobacillus	Actinobacillus	Bifidobacterium	Bacteroides	Adlercreutzia	Bacteroides	Bacteroides	Bilophila	Coprococcus	Clostridium
	Atopobium	Blautia	Bacteroides	Bilophila	Barnesiella	Bacteroides	Escherichia	Bifidobacterium	Christensenella	Bilophila		Actinoplanes	Actinoplanes	Bilophila	Blautia	Akkermansia	Bifidobacterium	Coprococcus	Brevibacillus	Dorea	Dialister
	Bacteroides	Clostridium	Bifidobacterium	Butyricicoccus	Blautia	Bifidobacterium	Prevotella	Campylobacter	Lactobacillus	Blautia		Aggregatibacter	Aggregatibacter	Eubacterium	Clostridium	Alistipes	Blautia	Feacalibacterium	Coprococcus	Faecalibacterium	Eubacterium
	Barnesiella	Collinsella	Blautia	Butyricimonas	Butyricicoccus	Bilophila	Streptococcus	Clostridium	Oscillospira	Collinsella		Akkermansia	Akkermansia	Faecalibacterium	Collinsella	Anaerotruncus	Collinsella	Lactobacillus	Eubacterium		Lachnoclostridium
	Bifidobacterium	Coprococcus	Clostridium	Clostridium	Citrobacter	Butyrivibrio		Dialister	Parabacteroides	Gamila		Alistipes	Alistipes	Prevotella	Coprococcus	Atopobium	Dorea	Moryella	Haemophilus	Prevotella	Roseburia
	Bilophila	Dorea	Collinsella	Collinsella	Clostridioides	Clostridium		Fusobacterium	Prevotella	Ordoribacter		Anaerostipes	Anaerotruncus	Roseburia	Dialister	Bacillus	Eubacterium	Oscillibacter	Neisseria	Roseburia	Turicibacter
	Blautia	Fusobacterium	Coprobacillus	Coprococcus	Clostridium	Collinsella		Haemophilus		Phascolarctobacterium		Anaerotruncus	Bacteroides		Dorea	Bacteroides	Faecalibacterium	Pseudobutyrivibrio	Subdoligranulum
	Butyricicoccus	Gemella	Dialister	Dialister	Dialister	Coprobacter		Lactobacillus				Bacteroides	Coprococcus		Faecalibacterium	Barnesiella	Odoribacter	Roseburia
	Butyricimonas	Granulicatella	Eggerthella	Eggerthella	Eggerthella	Coprococcus		Megasphaera				Bifidobacterium	Cupriavidus		Gemmiger	Bifidobacterium	Parabacteroides	Ruminococcus
	Clostridium	Granulicella	Enterobacter	Eubacterium	Eikenella	Faecalibacterium		Prevotella				Bilophila	Delftia		Haemophilus	Bilophila	Roseburia
	Collinsella	Haemophilus	Enterococcus	Faecalibacterium	Enterococcus	Flavonifractor		Streptocuccus				Blautia	Desulfitobacterium		Oscillospira	Blautia	Ruminococcus
	Coprobacillus	Ilyobacter	Escherichia	Flavonifractor	Erysipelatoclostridium	Holdemania		Veillonella				Clostridium	Eubacterium		Oxalobacter	Butyricicoccus	Subdoligranulum
	Coprococcus	Lactobacillus	Fusobacterium	Fusobacterium	Escherichia	Thalassospira						Collinsella	Gordonia		Parabacteroides	Butyrivibrio
	Dialister	Megasphaera	Klebsiella	Lachnospira	Eubacterium	Megasphaera						Coprococcus	Haemophilus		Phascolarctobacterium	Catonella
	Dorea	Mitsuokella	Lactobacillus	Lactobacillus	Flavonifractor	Odoribacter						Cupriavidus	Heliobacterium		Prevotella	Clostridium
	Eggerthella	Olsenella	Megasphaera	Megasphaera	Fusobacterium	Oscillibacter						Delftia	Holdemania		Roseburia	Collinsella
	Enterobacter	Oscillibacter	Methanobrevibacter	Parabacteroides	Hungatella	Oscillospira						Desulfitobacterium	Kingella		Ruminococcus	Coprococcus
	Enterococcus	Ruminococcus	Oribacterium	Parasutterella	Klebsiella	Paraprevotella						Dialister	Leptospira		Streptococcus	Coriobacterium
	Escherichia	Sebaldella	Parvimonas	Prevotella	Lachnoclostridium	Parasutterella						Dorea	Mannheimia		Turicibacter	Corynebacterium
	Eubacterium	Slackia	Peptostreptococcus	Roseburia	Lactobacillus	Rothia						Eubacterium	Mesoplasma			Desulfovibrio
	Faecalibacterium	Solobacterium	Ruminococcus	Ruminiclostridium	Megamonas	Ruminococcus						Faecalibacterium	Neisseria			Dorea
	Flavonifractor	Veillonella	Solobacterium	Ruminococcus	Parabacteroides	Subdoligranulum						Gemmiger	Nitrosomonas			Eggerthella
	Fusobacterium		Streptococcus	Streptococcus	Parvimonas							Gordonia	Odoribacter			Enorma
	Gemella		Subdoligranulum	Subdoligranulum	Pasteurella							Haemophilus	Oscillibacter			Enterorhabdus
	Granulicatella		Veillonella	Sutterella	Peptostreptococcus							Heliobacterium	Oxalobacter			Eubacterium
	Granulicella		Weissella	Veillonella	Proteus							Holdemania	Pelotomaculum			Faecalibacterium
	Haemophilus				Shigella							Kingella	Pseudoflavonifactor			Faecalitalea
	Ilyobacter				Streptococcus							Leptospira	Roseburia			Flavonifractor
	Klebsiella				Sutterella							Mannheimia	Ruminococcus			Gordonibacter
	Lachnospira											Mesoplasma	Sphingopyxis			Holdemanella
	Lactobacillus											Neisseria	Subdoligranulum			Holdemania
	Megasphaera											Nitrosomonas	Thermincola			Intestinibacter
	Methanobrevibacter											Odoribacter	Thermoanaerobacter			Intestinimonas
	Mitsuokella											Oscillibacter	Thermoanaerobacterium			Johnsonella
	Olsenella											Oscillospira	Victivallis			Lachnoanaerobaculum
	Oribacterium											Oxalobacter				Methanobrevibacter
	Oscillibacter											Parabacteroides				Odoribacter
	Parabacteroides											Pelotomaculum				Olsenella
	Parasutterella											Phascolarctobacterium				Oribacterium
	Parvimonas											Prevotella				Oscillibacter
	Peptostreptococcus											Pseudoflavonifactor				Paenibacillus
	Prevotella											Roseburia				Paraprevotella
	Roseburia											Ruminococcus				Peptoclostridium
	Ruminiclostridium											Sphingopyxis				Phascolarctobacterium
	Ruminococcus											Streptococcus				Prevotella
	Sebaldella											Subdoligranulum				Propionibacterium
	Slackia											Thermincola				Pseudomonas
	Solobacterium											Thermoanaerobacter				Romboutsia
	Streptococcus											Thermoanaerobacterium				Roseburia
	Subdoligranulum											Turicibacter				Ruminiclostridium
	Sutterella											Victivallis				Ruminococcus
	Veillonella															Selenomonas
	Weissella															Sellimonas
																Senegalimassilia
																Sharpea
																Slackia
																Stomatobaculum
																Streptococcus
																Streptomyces
																Subdoligranulum
																Terrisporobacter
																Treponema

## Sheet: Table 2
Table 2	Bacterial genera increased or decreased in interventions/drugs
Bold - Genus is seen In more than one study
increased															decreased
diet intervention		exercise	metfromin (4)		PPIs (3)		Statins (2)		antibiotics (2)		ace inhibitors	betablockers			diet intervention		exercise	metfromin (4)		PPIs (3)		Statins (2)		antibiotics (2)		ace inhibitors	betablockers
IBD	obesity	T2D	T2D (3)	Obesity	Liver cirrhosis	NS (2)	Old obese mice	NS	healthy	NS	NS	NS			IBD	obesity	T2D	T2D (3)	Obesity	Liver cirrhosis	NS (2)	Old obese mice	NS	healthy	NS	NS	NS
Hungatella	Akkermansia	Lactobacillus	Bilophila	Roseburia	Alloscardovia	Bifidobacterium	Oscillospira	Dorea	Escherichia	Bifidobacterium	Blautia	Streptococcus			Prevotella	Subdoligranulum	Bifidobacterium	Intestinibacter	Prevotella	Haemophilus	Coprococcus	Akkermansia		Alistipes		Bifidobacterium	Bifidobacterium
Bifidobacterium	Alistipes	Bacteroides	Escherichia	Blautia	Scardovia	Streptococcus	Mucispirillum	Clostridium	Veillonella	Blautia	Oscillibacter	Blautia			Bifidobacterium	Roseburia	Enterococcus	Clostridium	Faecalibacterium	Lachnospira	Faecalibacterium	Coprococcus		Clostridium
Hungatella	Anaerotruncus	Campylobacter	Lachnoclostridium	Bifidobacterium	Haemophilus	Bacteroides	Butyricimonas	Rothia	Klebsiella		Streptococcus	Rothia			Clostridium	Roseburia	Salmonella	Terrisporobacter	Lactobacillus	Atopobium	Subdoligranulum	Parabacteroides		Coprococcus
Intestinimonas	Bacillus	Clostridium	Shigella	Bacteroides	Rothia	Rothia	Bacteroides	Bacteroides			Ruminococcus				Bifidobacterium	Anaerobiospirillum	Escherichia	Dethiosulfovibrio	Akkermansia	Corynebacterium	Dorea	Lactobacillus		Dorea
Hungatella	clostridium	Shigella	Pectobacterium	Escherichia		Parabacteroides	Ruminococcus	Blautia			Actinomyces				Dorea	Parasutterella		Deferribacter	Intestinibacter	Oribacterium	Eubacterium			Eubacterium
Adlercreutzia	Dasuifitobacterium	Yersinia	Pantoea	Shigella		Haemophilus	Dorea	Streptococcus							Ruminococcus			Bartonella						Parabacteroides
Dorea	Desulfotomaculum		Serratia	Streptococcus		Blautia		Coprococcus							Lachnospira	Collinsella		Acetivibrio						Ruminococcus
Butyricicoccus	Dysgonomonas		Raphidiopsis	Butyrivibrio		Actinomyces									Anaerostipes			Hippea						Capnocytophaga
Eisenbergiella	Eggerthella		Dickeya	Butyricicoccus		Dialister									Blautia			Pseudogulbenkiania						Eggerthella
Faecalibacterium	Enterococcus		Helicobacter			Lactobacillus												Pseudoflavonifractor						Methanobrevibacter
Anaerostipes	Enterococcus		Shewanella			Veillonella												Subdoligranulum						Odoribacter
Alistipes	Escherichia		Erwinia															Coprococcus						Prevotella
	Ethanoligenens		Cronobacter															Dorea						Roseburia
	Fretibacterium		Rheinheimera																					Anaerotruncus
	Geobactor		Dermacoccus																					Bifidobacterium
	Holdemania		Yersinia																					Dialister
	Marvinbryantia		Bacillus																					Ruminococcus
	Oscillibacter		Pseudomonas
	Paenibacillus		Salmonella
	Pedobacter		Klebsiella
	Pseudoflavonifractor		Enterobacter
	Pseudomonas		Citrobacter
	Selenomonas		Streptococcus
	Slackia
	Streptomyces
	Thermanaerovibrio
	Treponema

## Sheet: Table 3
Table 3	Bacterial genera increased or decreased in gastric bands
Bold - Genus is seen In more than one study
increased							decreased
type of gastric band	Lacaroscopic adjustable GB	(Vertical) Gastric sleeve (VBG)	Gastric bypass (roux-en-Y)(RYGB)				type of gastric band	Lacaroscopic adjustable GB	(Vertical) Gastric sleeve (VBG)	Gastric bypass (roux-en-Y)(RYGB)
	Akkermansia	Roseburia	Acidaminococcus					Feacalibacterium	Veillonella	Alistipes
		Parabacteroides	Acinetobacter					Roseburia	Roseburia	Bifidobacterium
			Actinomyces							Clostridium
			Aeromonas						Bacteroides	Coprococcus
			Akkermansia						Parabacteroides	Dialister
			Alistipes							Dorea
			Anaerotruncus							Eubacterium
			Atopobium							Faecalibacterium
			Bacteroides							Gemella
			Bifidobacterium							Klebsiella
			Citrobacter							Prevotella
			Clostridium							Roseburia
			Coprobacillus							Ruminococcus
			Cronobacter							Streptococcus
			Dermacoccus							Subdoligranulum
			Desulfurispirillum							Veillonella
			Dickeya
			Edwardsiella
			Enterobacter
			Enterococcus
			Erwinia
			Escherichia
			escherichia
			Fusobacterium
			Gemella
			Granulicatella
			Klebsiella
			Leptotrichia
			Megasphaera
			Neisseria
			Odoribacter
			Oribacterium
			Pantoea
			Parabacteroides
			Pectobacterium
			Proteus
			Providencia
			Pseudomonas
			Rahnella
			Roseburia
			Ruminococcus
			Salmonella
			Serratia
			Shewanella
			Shigella
			Streptococcus
			Veillonella
			Vibrio
			Yersinia
